# Supplementary material for: Sensitivity to Deviance and to Dissimilarity: Basic Cognitive Processes Under Activation of the Behavioral Immune System
Source: PubMed Central journal article supplement — Evol Psychol. 2018 Nov 28;16(4):1474704918813433. doi: 10.1177/1474704918813433 (PMC10480945; doi:10.1177/1474704918813433), 2018-11-28

**Table S1.** *Results of Regression Analyses Predicting Face Differentiation (Study 1)*

| Predictor                | Regression 1 |              |             | Regression 2 |              |             |
|--------------------------|--------------|--------------|-------------|--------------|--------------|-------------|
|                          | $\beta$      | $t$          | $p$         | $\beta$      | $t$          | $p$         |
| Disgust Sensitivity (DS) | <b>.104</b>  | <b>1.938</b> | <b>.053</b> | <b>.219</b>  | <b>2.689</b> | <b>.008</b> |
| Gender                   | -            | -            | -           | -.181        | -3.130       | .002        |
| Religiosity              | -            | -            | -           | -.102        | -1.861       | .064        |
| Illness Recency (IR)     | -            | -            | -           | -.022        | -0.417       | .677        |
| DS $\times$ Gender       | -            | -            | -           | -.043        | -0.551       | .582        |
| DS $\times$ Religiosity  | -            | -            | -           | -.011        | -0.199       | .842        |
| DS $\times$ IR           | -            | -            | -           | -.023        | -0.423       | .673        |

**Table S2.** *Regression Analyses Results (Study 3a)*

| Measure                                              | Predictor                | Regression 1 |               |             | Regression 2 |               |             | Regression 3 |               |             |
|------------------------------------------------------|--------------------------|--------------|---------------|-------------|--------------|---------------|-------------|--------------|---------------|-------------|
|                                                      |                          | $\beta$      | $t$           | $p$         | $\beta$      | $t$           | $p$         | $\beta$      | $t$           | $p$         |
| Perceived Similarity of<br><i>Unrelated</i> Pictures | Disgust Sensitivity (DS) | <b>-.116</b> | <b>-2.017</b> | <b>.045</b> | <b>-.136</b> | <b>-1.379</b> | <b>.169</b> | <b>-.152</b> | <b>-2.180</b> | <b>.030</b> |
|                                                      | Gender                   | -            | -             | -           | -.015        | -0.215        | .830        | -.017        | -0.250        | .802        |
|                                                      | Religiosity              | -            | -             | -           | .109         | 1.723         | .086        | .108         | 1.750         | .081        |
|                                                      | Illness Recency_1 (IR1)  | -            | -             | -           | .072         | 0.953         | .341        | .073         | 0.992         | .322        |
|                                                      | Illness Recency_2 (IR2)  | -            | -             | -           | .112         | 1.491         | .137        | .109         | 1.490         | .137        |
|                                                      | DS $\times$ Gender       | -            | -             | -           | -.017        | -0.181        | .856        | -            | -             | -           |
|                                                      | DS $\times$ Religiosity  | -            | -             | -           | -.003        | -0.043        | .966        | -            | -             | -           |
|                                                      | DS $\times$ IR1          | -            | -             | -           | -.048        | -0.610        | .542        | -            | -             | -           |
| DS $\times$ IR2                                      | -                        | -            | -             | -.030       | -0.392       | .695          | -           | -            | -             |             |
| Perceived Similarity of<br><i>Related</i> Objects    | Disgust Sensitivity (DS) | -.048        | -0.830        | .407        | -.019        | -0.196        | .845        | -.086        | -1.219        | .224        |
|                                                      | Gender                   | -            | -             | -           | .017         | 0.246         | .806        | .023         | 0.341         | .733        |
|                                                      | Religiosity              | -            | -             | -           | .052         | 0.824         | .411        | .049         | 0.783         | .434        |
|                                                      | Illness Recency_1 (IR1)  | -            | -             | -           | .023         | 0.299         | .765        | .032         | 0.432         | .666        |
|                                                      | Illness Recency_2 (IR2)  | -            | -             | -           | .098         | 1.287         | .199        | .104         | 1.403         | .162        |
|                                                      | DS $\times$ Gender       | -            | -             | -           | -.065        | -0.706        | .481        | -            | -             | -           |
|                                                      | DS $\times$ Religiosity  | -            | -             | -           | .013         | 0.213         | .832        | -            | -             | -           |
|                                                      | DS $\times$ IR1          | -            | -             | -           | -.078        | -0.988        | .324        | -            | -             | -           |
| DS $\times$ IR2                                      | -                        | -            | -             | .025        | 0.318        | .751          | -           | -            | -             |             |

*Note.* Illness recency\_1 (IR1) = single-item illness recency measure; Illness Recency\_2 (IR2) = four-item illness recency measure

**Table S3.** Regression Analyses Results (Study 3b)

| Measure                                                 | Predictor                | Regression 1 |               |             | Regression 2 |               |             |
|---------------------------------------------------------|--------------------------|--------------|---------------|-------------|--------------|---------------|-------------|
|                                                         |                          | $\beta$      | $t$           | $p$         | $\beta$      | $t$           | $p$         |
| Perceived Similarity<br>of <i>Dissimilar</i><br>Objects | Disgust Sensitivity (DS) | -.053        | -.949         | .343        | -.078        | -0.625        | .532        |
|                                                         | Gender                   | -            | -             | -           | -.091        | -1.550        | .122        |
|                                                         | Religiosity              | -            | -             | -           | .214         | 3.597         | .000        |
|                                                         | Illness Recency (IR1)    | -            | -             | -           | -.066        | -1.156        | .249        |
|                                                         | DS $\times$ Gender       | -            | -             | -           | .002         | 0.018         | .986        |
|                                                         | DS $\times$ Religiosity  | -            | -             | -           | -.160        | -2.673        | .008        |
|                                                         | DS $\times$ IR1          | -            | -             | -           | .070         | 1.204         | .229        |
| Perceived Similarity<br>of <i>Similar</i> Objects       | Disgust Sensitivity (DS) | <b>-.123</b> | <b>-2.217</b> | <b>.027</b> | <b>-.283</b> | <b>-2.272</b> | <b>.024</b> |
|                                                         | Gender                   | -            | -             | -           | .039         | 0.660         | .510        |
|                                                         | Religiosity              | -            | -             | -           | .086         | 1.445         | .149        |
|                                                         | Illness Recency (IR1)    | -            | -             | -           | -.147        | -2.574        | .011        |
|                                                         | DS $\times$ Gender       | -            | -             | -           | .141         | 1.150         | .251        |
|                                                         | DS $\times$ Religiosity  | -            | -             | -           | -.122        | -2.023        | .044        |
|                                                         | DS $\times$ IR1          | -            | -             | -           | .109         | 1.866         | .063        |

**Figure S1.** Perceived Similarity of Related Pairs (Panel A) and Unrelated Pairs (Panel B) as a Function of Religiosity and Disgust Sensitivity (Study 3b).

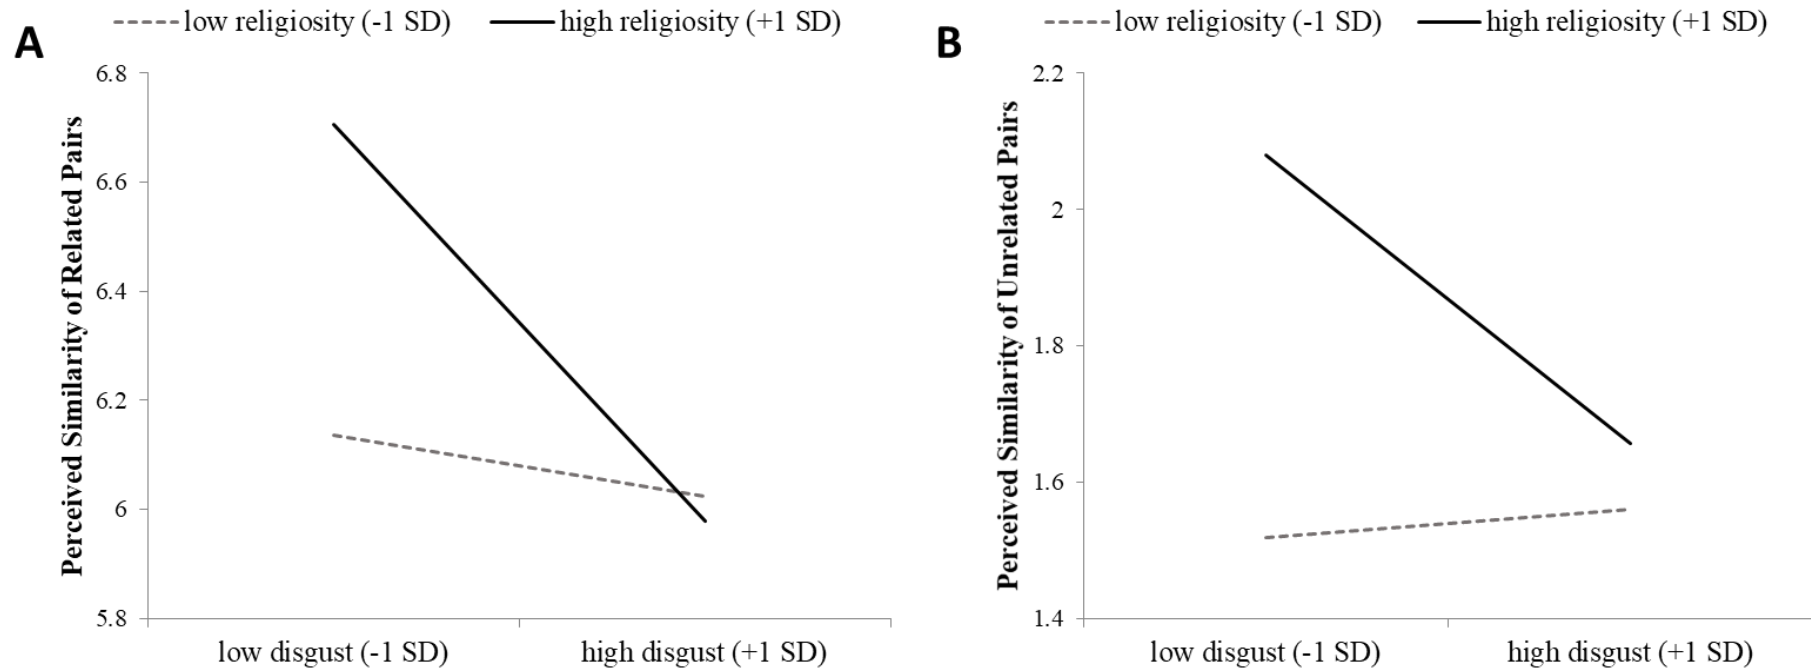

Supplement: SupplementaryMaterial-R2.pdf [file SupplementaryMaterial-R2.pdf]
